# Supplementary material
Source: PubMed Central journal article supplement (PMC5865234)
Supplement: blood806729-suppl1.pdf [file blood806729-suppl1.pdf]

**Table S1. Listing of baseline characteristics**

| Patient | Sex | Age (yr) | Age at Diagnosis | Clinical manifestations of disease                      |                          |                                                                              | Plasminogen   |                  |
|---------|-----|----------|------------------|---------------------------------------------------------|--------------------------|------------------------------------------------------------------------------|---------------|------------------|
|         |     |          |                  | Lesion (symptom) history                                | Lesion Duration          | Prior treatments of disease                                                  | Activity* (%) | Antigen† (mg/dL) |
| 1       | F   | 39       | 1 yr             | Conjunctiva<br>Ear (pain, itching)<br>Cervix (pain)     | 6 mo‡<br>38 yr<br>22 yr‡ | Surgery: ear                                                                 | 29            | 3.8              |
| 2       | M   | 35       | 10 mo            | Conjunctiva (discharge, pain)                           | 15 yr‡                   | Eye drop: heparin, cyclosporine,<br>plasminogen<br>Surgery: conjunctival (9) | 43            | 5.4              |
| 3       | F   | 16       | 3 yr             | Conjunctiva (discharge, tearing, redness)<br>Ear (pain) | 4 yr<br>12 yr            | Eye drop: heparin, cyclosporine<br>Infusion: FFP                             | 28            | 5.6              |

**Table S1. Listing of baseline characteristics**

| Patient | Sex  | Age<br>(yr) | Age at<br>Diagnosis | Clinical manifestations of disease        |                    |                                    | Plasminogen      |                     |
|---------|------|-------------|---------------------|-------------------------------------------|--------------------|------------------------------------|------------------|---------------------|
|         |      |             |                     | Lesion (symptom) history                  | Lesion<br>Duration | Prior treatments of disease        | Activity*<br>(%) | Antigen†<br>(mg/dL) |
| 4       | F    | 24          | 2 yr                | Conjunctiva (discharge, tearing, redness) | 8 yr               | Eye drop: heparin, chloramphenicol | 28               | 13.4                |
|         |      |             |                     | Nasopharynx                               | 10 yr              | Surgery: cervical (1)              |                  |                     |
|         |      |             |                     | Gingiva                                   | 19 yr‡             | Infusion: FFP                      |                  |                     |
|         |      |             |                     | Tonsils (pain, swelling)                  | 17 yr              |                                    |                  |                     |
|         |      |             |                     | Vocal cords                               | 11 yr              |                                    |                  |                     |
|         |      |             |                     | Lungs (pain in chest)                     | 1 mo‡              |                                    |                  |                     |
|         |      |             |                     | Cervix                                    | 6 yr               |                                    |                  |                     |
|         |      |             |                     | Ovaries                                   | 6 yr               |                                    |                  |                     |
| Urethra | 6 yr |             |                     |                                           |                    |                                    |                  |                     |
| 5       | M    | 20          | 10 yr               | Conjunctiva (discharge)                   | 1 yr               | Eye drop: heparin                  | 22               | 2.1                 |

**Table S1. Listing of baseline characteristics**

| Patient | Sex | Age (yr) | Age at Diagnosis | Clinical manifestations of disease                                                                                                                            |                                                               |                                                                                                                                                                                                         | Plasminogen   |                  |
|---------|-----|----------|------------------|---------------------------------------------------------------------------------------------------------------------------------------------------------------|---------------------------------------------------------------|---------------------------------------------------------------------------------------------------------------------------------------------------------------------------------------------------------|---------------|------------------|
|         |     |          |                  | Lesion (symptom) history                                                                                                                                      | Lesion Duration                                               | Prior treatments of disease                                                                                                                                                                             | Activity* (%) | Antigen† (mg/dL) |
| 6       | F   | 37       | 14 yr            | Conjunctiva (discharge)<br>Gingiva<br>Nasopharynx<br>Lungs (chronic cough, wheezing, respiratory distress, airway obstruction)<br>Kidneys<br>Cervix<br>Uterus | 35 yr‡<br>8 yr‡<br>1 mo‡<br>29 yr‡<br>8 yr‡<br>1 yr§<br>1 yr§ | Eye drops: heparin, cyclosporine, corticosteroid, naphazoline, plasminogen<br>Surgery: conjunctival (at least 18), nasal, tracheal, cervical, uterine<br>Other: laryngoscopy/bronchoscopy (at least 43) | <5            | <0.5             |
| 7       | F   | 24       | 10.5 yr          | None<br>(cervical bleeding and pain)                                                                                                                          | NA                                                            | None                                                                                                                                                                                                    | 31            | 5.2              |
| 8       | F   | 5        | 5 yr             | Conjunctiva (discharge, tearing)<br>Vagina (bleeding)                                                                                                         | 1 yr‡<br>1 mo‡                                                | Eye drop: moxifloxacin, heparin, cyclosporine, fluorometholone<br>Surgery: conjunctival (3)                                                                                                             | 22            | 3.4              |

**Table S1. Listing of baseline characteristics**

| Patient | Sex | Age (yr) | Age at Diagnosis | Clinical manifestations of disease                                                                                                                                 |                                       |                                                                                                                                         | Plasminogen   |                  |
|---------|-----|----------|------------------|--------------------------------------------------------------------------------------------------------------------------------------------------------------------|---------------------------------------|-----------------------------------------------------------------------------------------------------------------------------------------|---------------|------------------|
|         |     |          |                  | Lesion (symptom) history                                                                                                                                           | Lesion Duration                       | Prior treatments of disease                                                                                                             | Activity* (%) | Antigen† (mg/dL) |
| 9       | F   | 16       | 8 yr             | Conjunctiva (ligneous conjunctivitis, tear duct infection)<br>Vagina (ligneous vaginitis)<br>Colon (constipation, blood stools, rectal mucous discharge, tenesmus) | 3 yr<br>2.5 yr‡<br>6 mo‡              | Surgery: pseudomembrane (4)<br>Eye drop: moxifloxacin,<br>prednisolone, loteprednol,<br>cyclosporine, olopatadine, FFP<br>Infusion: FFP | 20            | 4.8              |
| 10      | F   | 11       | 5 yr             | Conjunctiva (discharge, tearing, redness)                                                                                                                          | 11 yr‡                                | Surgery: pseudomembrane (4)<br>Eye drop: heparin, prednisolone,<br>cyclosporine, FFP<br>Infusion: FFP                                   | 17            | 3.5              |
| 11      | M   | 6        | 5 yr             | Conjunctiva (discharge)<br>Vocal cords (hoarse voice)                                                                                                              | 1 mo<br>1 yr§                         | Surgery: pseudomembrane (2)<br>Eye drop: heparin, cyclosporine                                                                          | 29            | 5.5              |
| 12      | M   | 33       | Birth            | Conjunctiva (ligneous conjunctivitis)<br>Nose (nasal congestion)<br>Delayed wound healing  <br>Palmar/plantar warts  <br>Lungs (airway obstruction)                | UNK‡<br>3 yr§<br>UNK‡<br>UNK‡<br>UNK§ | Surgery: conjunctival (1)<br>Infusion: FFP                                                                                              | <5            | <0.5             |

**Table S1. Listing of baseline characteristics**

| Patient | Sex | Age (yr) | Age at Diagnosis | Clinical manifestations of disease    |                 |                             | Plasminogen   |                  |
|---------|-----|----------|------------------|---------------------------------------|-----------------|-----------------------------|---------------|------------------|
|         |     |          |                  | Lesion (symptom) history              | Lesion Duration | Prior treatments of disease | Activity* (%) | Antigen† (mg/dL) |
| 13      | F   | 33       | UNK              | Conjunctiva (ligneous conjunctivitis) | 33 yr‡          | Surgery: conjunctival (1)   | 15            | 4.0              |
|         |     |          |                  | Delayed wound healing (scars)         | 33 yr‡          | Eye drop: plasminogen       |               |                  |
|         |     |          |                  | Uterus                                | 23 yr§          | Infusion: FFP               |               |                  |
| 14      | F   | 42       | 39 yr            | Conjunctiva (ligneous conjunctivitis) | 42 yr‡          | None                        | <5            | <0.5             |
|         |     |          |                  | Gingiva                               | 42 yr‡          |                             |               |                  |
|         |     |          |                  | Tumors, wrists                        | UNK‡            |                             |               |                  |
|         |     |          |                  | Palmar/plantar warts                  | UNK‡            |                             |               |                  |
|         |     |          |                  | Lung (airway obstruction)             | UNK§            |                             |               |                  |
|         |     |          |                  | Abdomen (pain)                        | 15 yr§          |                             |               |                  |

F indicates female; FFP, fresh frozen plasma; M, male; NA, not applicable; and UNK unknown.

\*Plasminogen activity normal range is 70-130%.

†Plasminogen antigen normal range is 6-20 mg/dL.

‡Lesion ongoing and assessed in the study.

§Lesion ongoing but not assessed in the study.

||Skin lesions represent manifestations of abnormal wound healing due to congenital plasminogen deficiency.

**Table S2. Listing of genetic profiles**

| Patient | Sex | Plasminogen |               |                  | Genetic profile                                                                                                                                                                                                    |
|---------|-----|-------------|---------------|------------------|--------------------------------------------------------------------------------------------------------------------------------------------------------------------------------------------------------------------|
|         |     | Age (yr)    | Activity* (%) | Antigen† (mg/dL) |                                                                                                                                                                                                                    |
| 1‡      | F   | 39          | 29            | 3.8              | Heterozygous missense variant (c.112A>G, p.Lys38Glu) in exon 2 of <i>PLG</i> , with 3 additional common heterozygous variants detected (c.330C>T, p.Asn110Asn; c.1083A>G, p.Gln361Gln; and c.1414G>A, p.Asp472Asn) |
| 2‡      | M   | 35          | 43            | 5.4              | Heterozygous missense variant (c.112A>G, p.Lys38Glu) in exon 2, with 3 additional common heterozygous variants detected (c.330C>T, p.Asn110Asn; c.1083A>G, p.Gln361Gln; and c.1414G>A, p.Asp472Asn)                |
| 3       | F   | 16          | 28            | 5.6              | Heterozygous missense variant (c.112A>G, p.Lys38Glu) in exon 2 of <i>PLG</i>                                                                                                                                       |
| 4       | F   | 24          | 28            | 13.4             | Heterozygous missense variant (c.112A>G, p.Lys38Glu) in exon 2 of <i>PLG</i> and a heterozygous missense mutation (c.2278A>G, p.Ser760Gly) in exon 19 of <i>PLG</i>                                                |
| 5       | M   | 20          | 22            | 2.1              | Homozygous missense variant (c.112A>G, p.Lys38Glu) in exon 2 of <i>PLG</i> , with 2 homozygous silent variants (c.330C>T and C.1083A>G) and 1 homozygous missense variant (c.1414G>A, p.Asp472Asn)                 |

**Table S2. Listing of genetic profiles**

| Patient | Sex | Plasminogen |               |                  | Genetic profile                                                                                                                                                                                                                                                                                                                                              |
|---------|-----|-------------|---------------|------------------|--------------------------------------------------------------------------------------------------------------------------------------------------------------------------------------------------------------------------------------------------------------------------------------------------------------------------------------------------------------|
|         |     | Age (yr)    | Activity* (%) | Antigen† (mg/dL) |                                                                                                                                                                                                                                                                                                                                                              |
| 6       | F   | 37          | <5            | <0.5             | Heterozygous, single amino acid deletion (c.687_689delGAA, p.Lys230del) in exon 7 of <i>PLG</i> , heterozygous frameshift deletion (c.2125_2125delG, p.Gly709fs) in exon 17 of <i>PLG</i> , with 5 heterozygous silent variants (c.330C>T, c.771T>C, c.942C>T, c.1083A>G, and c.2286T>G) and 1 common heterozygous missense variant (c.1414G>A, p.Asp472Asn) |
| 7       | F   | 24          | 31            | 5.2              | Heterozygous missense variant (c.112A>G, p.Lys38Glu) in exon 2 of <i>PLG</i> , with a heterozygous frameshift deletion (c.2335_2336delC, p.Trp780fs) of unknown significance in exon 19 of <i>PLG</i> and 4 heterozygous silent variants (c.330C>T, c.771T>C, c.942C>T and c.1083A>G) and 1 heterozygous missense variant (c.1414G>A, p.Asp472Asn)           |
| 8       | F   | 5           | 22            | 3.4              | Heterozygous missense variant (c.112A>G, p.Lys38Glu) in exon 2 of <i>PLG</i> , with a heterozygous splice site mutation (Chr6:161152265, G>A) 1bp downstream from the end of exon 11 of <i>PLG</i> and 5 heterozygous silent variants (c.330C>T, c.771T>C, c.942C>T, C.1083A>G, and c.2286T>G) and 1 heterozygous missense variant (c.1414G>A, p.Asp472Asn)  |

**Table S2. Listing of genetic profiles**

| Patient | Sex | Plasminogen |               |                  | Genetic profile                                                                                                                                                                                                                                                                                                                                                         |
|---------|-----|-------------|---------------|------------------|-------------------------------------------------------------------------------------------------------------------------------------------------------------------------------------------------------------------------------------------------------------------------------------------------------------------------------------------------------------------------|
|         |     | Age (yr)    | Activity* (%) | Antigen† (mg/dL) |                                                                                                                                                                                                                                                                                                                                                                         |
| 9       | F   | 16          | 20            | 4.8              | Heterozygous missense variant (c.112A>G, p.Lys38Glu) in exon 2 of <i>PLG</i> , with heterozygous missense variant (c.704G>A, p.Arg235His) in exon 7 of <i>PLG</i> , with 5 heterozygous silent variants (c.330C>T, c.771T>C, c.942C>T, c.1083A>G, and c.2286T>G) and 1 heterozygous missense variant (c.1414G>A, p.Asp472Asn)                                           |
| 10      | F   | 11          | 17            | 3.5              | Heterozygous pathogenic variants (c.112A>G, p.IK38E in exon 2 and c.185+1G>T in intron 2) of <i>PLG</i> and a heterozygous variant (c.1468G>A, p.G490R) in exon 10 of <i>CACNA1C</i>                                                                                                                                                                                    |
| 11      | M   | 6           | 29            | 5.5              | Homozygous missense variant (c.112A>G, p.Lys38Glu) in exon 2 of <i>PLG</i> , with 2 homozygous silent variants (c.330C>T and c.1083A>G) and 1 homozygous missense variant (c.1414G>A, p.Asp472Asn)                                                                                                                                                                      |
| 12§     | M   | 33          | <5            | <0.5             | Homozygous missense variant (c.2T>C, p.Met1Thr) in the start codon of <i>PLG</i> , with 2 homozygous silent variants (c.330C>T and c.1083A>G) and 1 homozygous missense variant (c.1414G>A, p.Asp472Asn)                                                                                                                                                                |
| 13      | F   | 33          | 15            | 4.0              | Heterozygous missense variant (c.112A>G, p.Lys38Glu) in exon 2 of <i>PLG</i> and a heterozygous deletion (c.493_516del_TATACTACTGATCCAGAAAAGAGA, p.Tyr165_Arg172del) of unknown significance in exon 5 of <i>PLG</i> ., with 4 heterozygous silent variants (c.330C>T, c.1083A>G, c.2082T>C and c.2286T>G) and 1 heterozygous missense variant (c.1414G>A, p.Asp472Asn) |



**Table S2. Listing of genetic profiles**

| Patient | Sex | Plasminogen |               |                  | Genetic profile                                                                                                                                                                                                 |
|---------|-----|-------------|---------------|------------------|-----------------------------------------------------------------------------------------------------------------------------------------------------------------------------------------------------------------|
|         |     | Age (yr)    | Activity* (%) | Antigen† (mg/dL) |                                                                                                                                                                                                                 |
| 14§     | F   | 42          | <5            | <0.5             | Homozygous missense variant (c.2T>C, p.Met1Thr) in the start codon of <i>PLG</i> , with 2 common homozygous silent variants (c.330C>T and c.1083A>G) and 1 homozygous missense variant (c.1414G>A, p.Asp472Asn) |

DNA was extracted from whole blood samples prior to targeted multiplex polymerase chain reaction to selectively amplify the exonic regions of the plasminogen gene, including flanking regions with splice sites. Next, generation sequencing was performed on the amplified fragments, and the sequence was compared to the reference Human genome 19 sequence. The minimum read depth was set to 40 reads per base pair for acceptable sequencing. All mutations, disease-associated polymorphisms, benign polymorphisms, and other known variants of undetermined significance were noted and described. Plasminogen genetic testing was performed centrally by Machaon Diagnostics, Oakland, California.

F indicates female and M, male.

\* Plasminogen activity normal range is 70-130%.

† Plasminogen antigen normal range is 6-20 mg/dL.

‡ Patient 1 and Patient 2 are siblings.

§ Patient 12 and Patient 14 are siblings.
